# Supplementary material
Source: PubMed Central journal article supplement (PMC1366978)
Supplement: biophysj_105.062695_1.pdf [file biophysj_105.062695_1.pdf]

## Supplemental Material for “Effect of Protein Binding on Ultrafast DNA Dynamics: Characterization of a DNA:APE1 Complex”

Sobhan Sen,<sup>\*</sup> Nicole A. Paraggio,<sup>\*</sup> Latha A. Gearheart,<sup>#</sup> Ellen E. Connor,<sup>†</sup> Ala Issa,<sup>†</sup> Robert S. Coleman,<sup>§</sup> David M. Wilson III,<sup>¶</sup> Michael D. Wyatt,<sup>†</sup> and Mark A. Berg<sup>\*</sup>

<sup>\*</sup>Department of Chemistry and Biochemistry and <sup>†</sup>Department of Basic Pharmaceutical Sciences, University of South Carolina, Columbia, South Carolina 29208,

<sup>#</sup>Department of Chemistry, Presbyterian College, Clinton, South Carolina 29325,

<sup>§</sup>Department of Chemistry, The Ohio State University, Columbus, Ohio 43210 USA, and

<sup>¶</sup>Laboratory of Molecular Gerontology, National Institute of Aging, Baltimore, Maryland 21224 USA

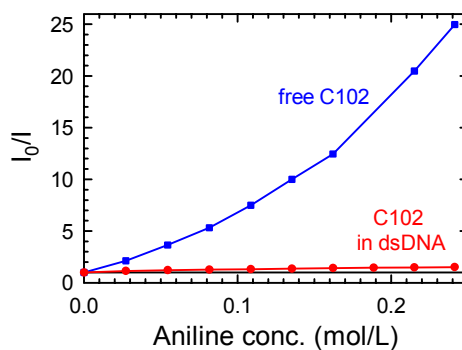

Fig. S1. Stern-Volmer plot of the quenching of coumarin fluorescence by aniline when the coumarin is free in solution (blue squares) and when the coumarin is covalently bound within an oligonucleotide (red circles). In the oligonucleotide, the coumarin is effectively shielded from the solvent, preventing quenching by the aniline. The vertical axis gives the ratio of the integrated fluorescence intensity without aniline to the intensity with aniline. The solutions were buffered at pH 10.2 with  $\text{NaHCO}_3/\text{Na}_2\text{CO}_3$  to avoid protonation of the aniline.
